# Supplementary material for: Targeting RNA Polymerase I Transcription Activity in Osteosarcoma: Pre-Clinical Molecular and Animal Treatment Studies
Source: MDPI journal article supplement (doi:10.3390/biomedicines11041133), 2023-04-09
Supplement: s1 [file s1]

## Supplementary Data

### *1. Supplementary methods*

#### *Genome profiling assay*

The Ampliseq™ Cancer Childhood Panel DNA assay (Illumina) detects single nucleotide variants (SNV) from hotspots of 86 genes, full exons of 44 genes, and copy number variants (CNV) from 28 clinically relevant cancer genes. DNA was extracted from the cell lines using the ReliaPrep tissue DNA extraction kit (Promega, Madison, WI, USA). The Childhood Cancer Research Assay primers and AmpliSeq Library Kit Plus (Illumina) which were used for library preparation. The prepared libraries were sequenced using a MiniSeq sequencer (Illumina). Base calling and mapping to a reference genome (hg19) was performed using the BaseSpace Informatics suite (Illumina). SNV variant calling was performed in DNA amplicon application (Illumina, version 2.1.1). CNV calling was performed in OncoCNV caller application (Illumina, version 1.2.0). All VCF files were loaded into variant interpreter (version 2.7.0.412) for interpretation. SNV somatic candidates were selected based on minimum coverage reads of more than 100, minimum allele frequency of 10%, cosmic reported variant and less than 1% prevalence in the 1000 Genome Population Database. CNV candidates with more than 10 gene copies were identified.

## 2. Supplementary figures

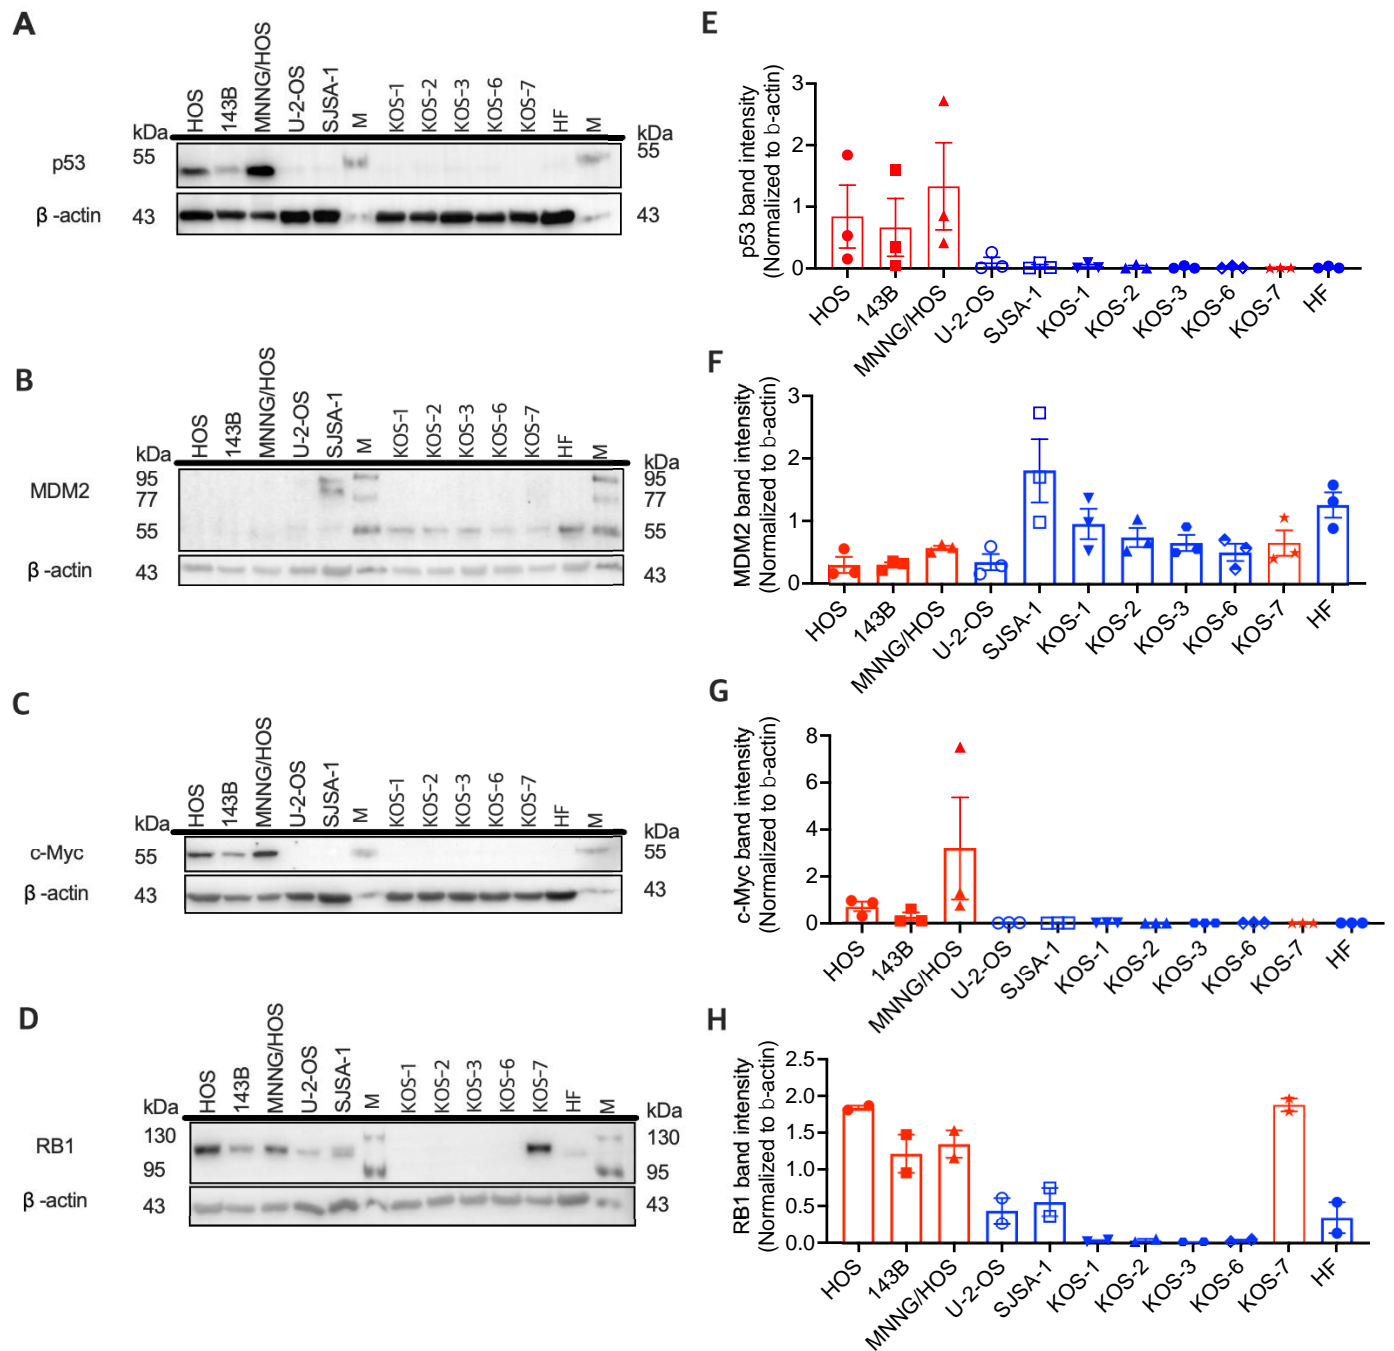

**Supplementary Figure S1. Four key proteins that are known regulators of RNA Pol I activity are dysregulated in human OS cell lines.**

Basal levels of **A** p53, **B** MDM2, **C** c-Myc and **D** RB1 protein expression were evaluated by western blot analysis with  $\beta$ -actin used as an internal loading control. **E–H**, Quantification of band intensities are shown following normalisation to  $\beta$ -actin. The blots shown are representative of independent biological replicates (p53, MDM2 and c-Myc:  $n=3$ , RB1:  $n=2$ ). Colours indicate p53 status determined from sequencing and western blot analysis (Supplementary Table 1). Normal p53: *TP53* wild type

with the normal level of p53 protein expression, Abnormal p53: *TP53* mutant or the dysregulated level of p53 protein expression. M= molecular marker; HF = human fibroblasts.

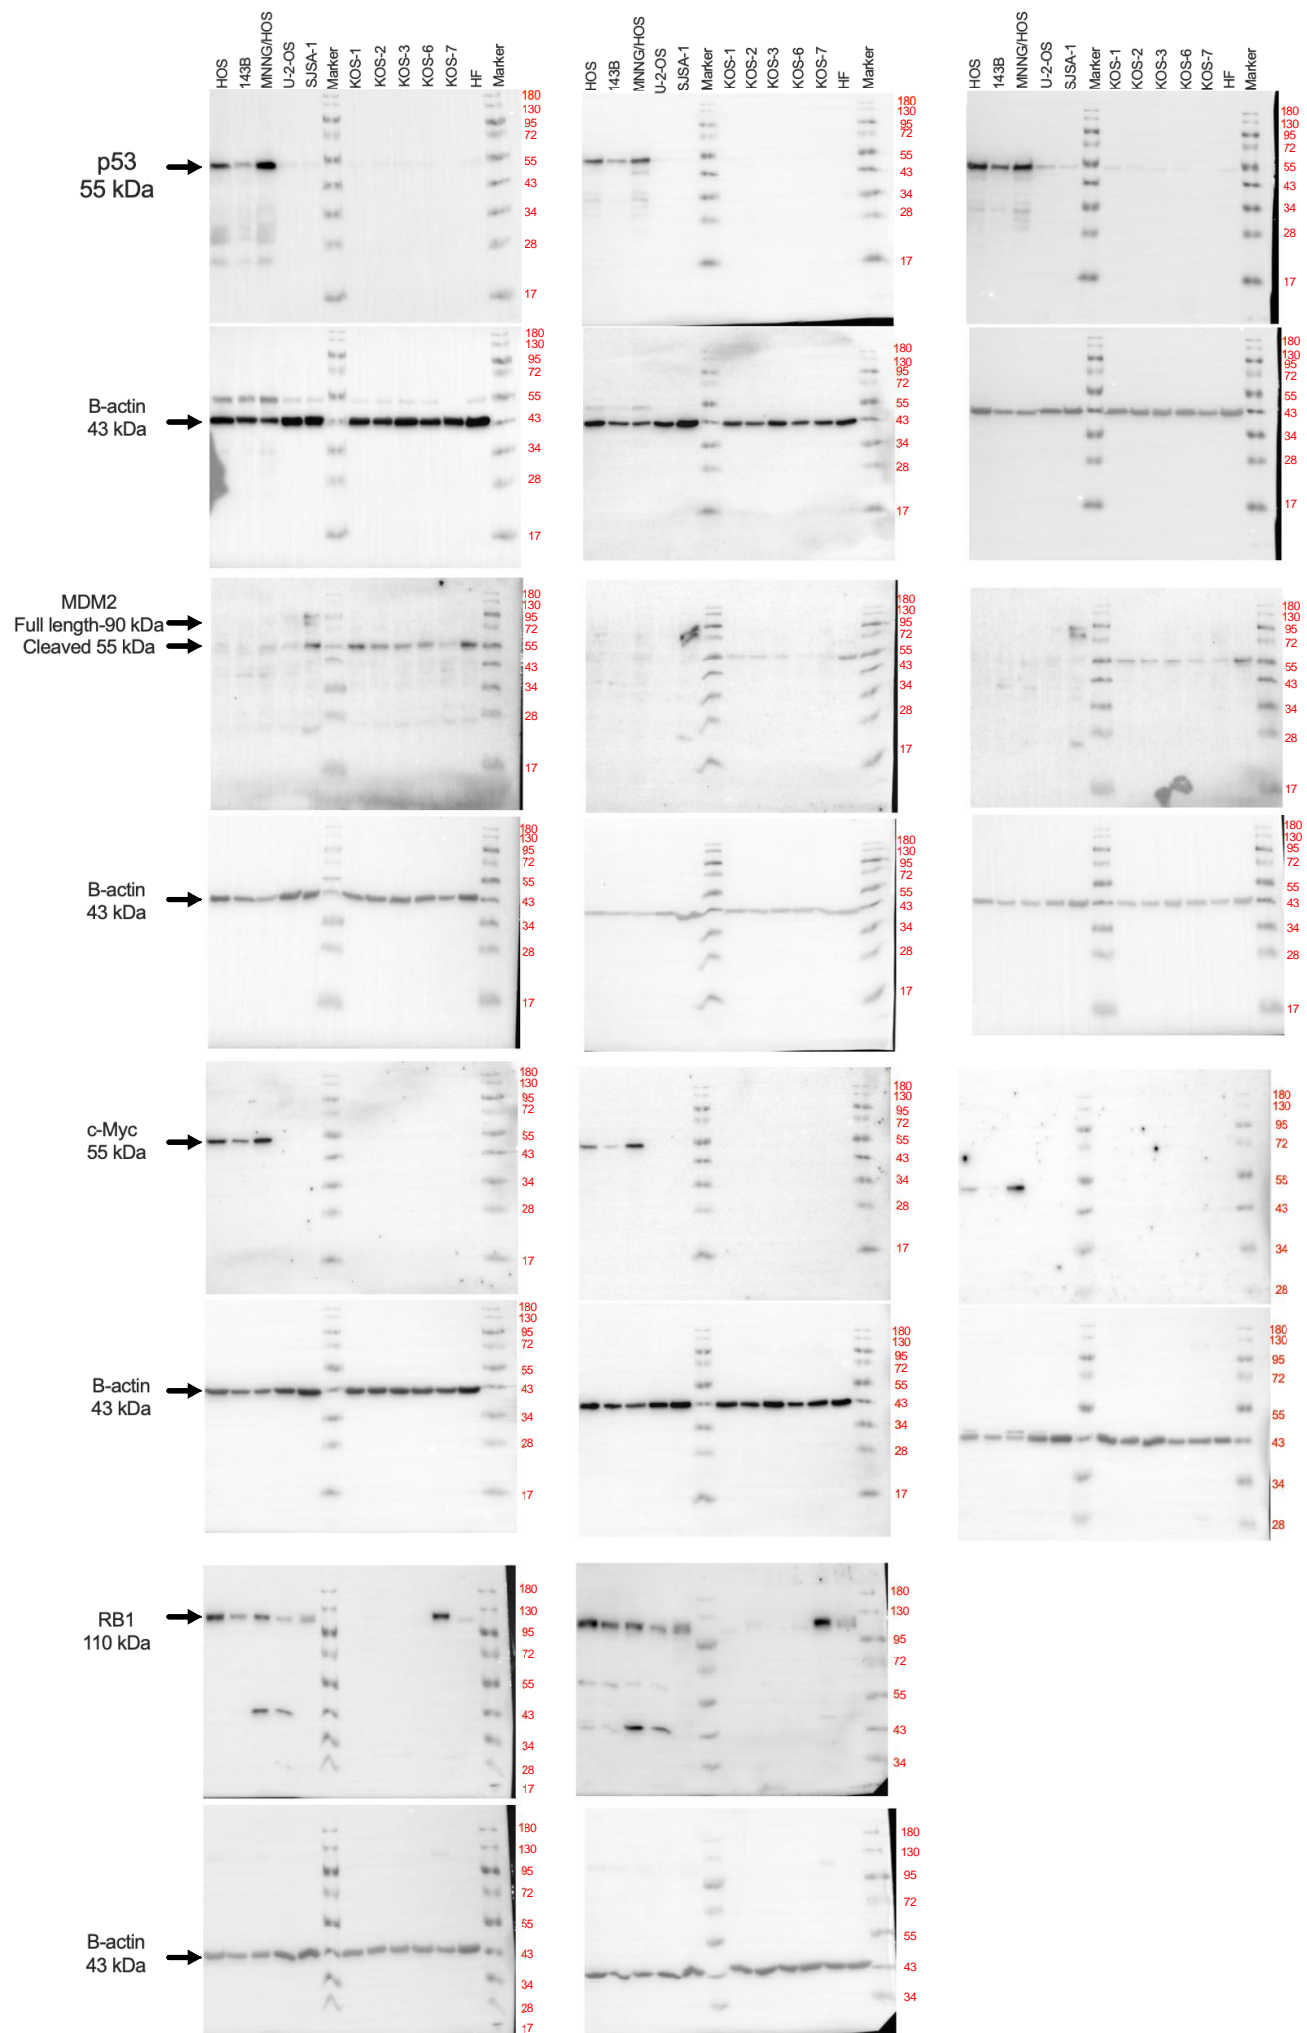

**Supplementary Figure S2. Unedited western blots of four key proteins that are known regulators of RNA Pol I activity in OS cell lines.** p53, MDM2, c-Myc and RB1 protein expression were estimated by western blot analysis.

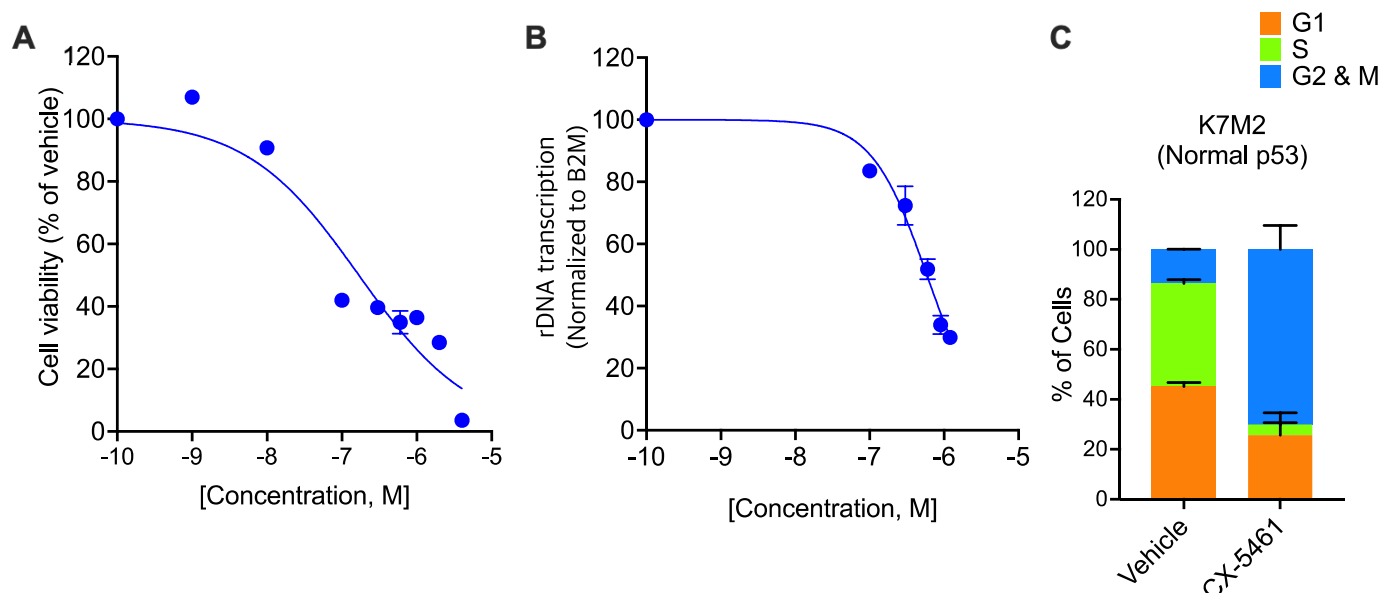

**Supplementary Figure S3. CX-5461 shows anti-tumour effects on murine OS cell line, K7M2, in-vitro**

**A** Murine OS K7M2 cells were treated with various concentrations of CX-5461 or vehicle for 72 hours and assessed for proliferation via IncuCyte® ZOOM Live Cell Imaging System. A dose-response curve with GIC<sub>50</sub> of CX-5461 was generated using non-regression analysis with mean  $\pm$  SEM of  $n=3$  biological replicates. **B** The effects of CX-5461 or vehicle for 1 hour on rDNA transcription activity in K7M2 cells was estimated by qRT-PCR with the result of the external transcribed spacer (ETS) normalised to  $\beta 2$  microglobulin ( $\beta 2M$ ). A dose-response curve was calculated using non-linear regression analysis, mean  $\pm$  SEM of  $n=3$  biological triplicates. **C** K7M2 cells treated with the GIC<sub>50</sub> CX-5461 dose (585 nM) determined from (A) or vehicle for 72 hr and cell cycle progression was analysed using BrdU/PI staining and flow cytometry, mean  $\pm$  SD of  $n=2$  biological duplicates.

### 3. Supplementary Tables

**Supplementary Table S1. Genetic mutations in OS cell lines.**

| Cell line | Genes                     | Names                                              | CNVs* | Mutation status | Consequence                           |
|-----------|---------------------------|----------------------------------------------------|-------|-----------------|---------------------------------------|
| HOS       | <i>Tumour suppressors</i> |                                                    |       |                 |                                       |
|           | TP53                      | Tumour protein p53                                 |       | p.Arg156Pro     | Missense variant                      |
|           | PTCH1                     | Protein patched homolog 1                          |       | p.Arg1442Trp    | Missense variant                      |
|           | TSC1                      | Tuberous sclerosis-1                               |       | c.2626-4dupT    | Splice region variant, Intron variant |
|           | TSC2                      | Tuberous sclerosis-2                               |       | p.Arg1706Cys    | Missense variant                      |
|           | FASLG                     | Tumour Necrosis Factor Ligand superfamily member 6 |       | p.Phe87Leu      | Missense variant                      |
|           | ARID1B                    | AT-rich interaction domain 1B                      |       | p.Gln131dup     | Inframe insertion                     |
|           | NF1                       | Neurofibromin 1                                    |       | p.Val689Met     | Missense variant                      |
| 143B      | TCF3                      | Transcription factor 3                             |       | p.Gly431Ser     | Missense variant                      |
|           | <i>Tumour suppressors</i> |                                                    |       |                 |                                       |
|           | TP53                      | Tumour protein p53                                 |       | p.Arg156Pro     | Missense variant                      |
|           | PTCH1                     | Protein patched homolog 1                          |       | p.Arg1442Trp    | Missense variant                      |
|           | TSC1                      | Tuberous sclerosis-1                               |       | c.2626-4dup     | Splice region variant, Intron variant |
|           | TSC2                      | Tuberous sclerosis-2                               |       | p.Arg1706Cys    | Missense variant                      |
|           | FASLG                     | Tumour Necrosis Factor Ligand superfamily member 6 |       | p.Phe87Leu      | Missense variant                      |
|           | ARID1B                    | AT-rich interaction domain 1B                      |       | p.Gln131dup     | Inframe insertion                     |
| MNNG/HOS  | NF1                       | Neurofibromin 1                                    |       | p.Val689Met     | Missense variant                      |
|           | TCF3                      | Transcription factor 3                             |       | p.Gly431Ser     | Missense variant                      |
| MNNG/HOS  | <i>Tumour suppressors</i> |                                                    |       |                 |                                       |
|           | RB1                       | Retinoblastoma 1                                   |       | c.1696-3T>C     | Splice region variant, Intron variant |

|                                  |                         |                                                    |                      |                                       |
|----------------------------------|-------------------------|----------------------------------------------------|----------------------|---------------------------------------|
|                                  | TP53                    | Tumour protein p53                                 | p.Arg156Pro          | Missense variant                      |
|                                  | PTCH1                   | Protein patched homolog 1                          | P.Arg1442Trp         | Missense variant                      |
|                                  | TSC1                    | Tuberous sclerosis-1                               | c.2626-4dupT         | Splice region variant, Intron variant |
|                                  |                         |                                                    | c.2626-5_2626-4dupTT | Splice region variant, Intron variant |
|                                  | TSC2                    | Tuberous sclerosis-2                               | p.Arg1706Cys         | Missense variant                      |
|                                  | FASLG                   | Tumour Necrosis Factor Ligand superfamily member 6 | p.Phe87Leu           | Missense variant                      |
|                                  | ARID1B                  | AT-rich interaction domain 1B                      | p.Gln131dup          | Inframe insertion                     |
|                                  | NF1                     | Neurofibromatosis type 1                           | p.Val689Met          | Missense variant                      |
|                                  | TCF3                    | Transcription factor 3                             | p.Gly431Ser          | Missense variant                      |
| <b><i>Tumour suppressors</i></b> |                         |                                                    |                      |                                       |
| U-2-OS                           | TET2                    | Methylcytosine dioxygenase TET2                    |                      |                                       |
|                                  | TSC1                    | Tuberous sclerosis-1                               | c.2626-5_2626-4dupTT | Splice region variant, Intron variant |
|                                  |                         |                                                    | c.2626-4dupT         | Splice region variant, Intron variant |
|                                  | TSC2                    | Tuberous sclerosis-2                               | p.Val1144Met         | Missense variant                      |
|                                  | <b><i>Oncogenes</i></b> |                                                    |                      |                                       |
|                                  | H3F3A                   | H3 histone, family 3A                              | p.Val36Leu           | Missense variant                      |
|                                  |                         |                                                    | p.Gly35_Val36insPhe  | Inframe insertion                     |
|                                  | PPM1D                   | Protein Phosphatase 1D                             | p.Arg458Ter          | Stop gained                           |
| <b><i>Tumour suppressors</i></b> |                         |                                                    |                      |                                       |
| SJSA-1                           | TSC2                    | Tuberous sclerosis-2                               | p.Pro1305Leu         | Missense variant                      |
|                                  | ARID1B                  | AT-rich interaction domain 1B                      | p.Gly953Ser          | Missense variant                      |
|                                  |                         |                                                    | p.Gln131dup          | Inframe insertion                     |
|                                  | KMT2D                   | Histone-lysine N-methyltransferase 2D              | p.Tyr2199IlefsTer65  | Frameshift variant                    |

|                           |                                         |                                       |                    |                                       |
|---------------------------|-----------------------------------------|---------------------------------------|--------------------|---------------------------------------|
|                           |                                         |                                       | p.Tyr2196Ter       | Stop gained                           |
| TCF3                      | Transcription factor 3                  |                                       | p.Gly1196Ser       | Missense variant                      |
| <i>Oncogenes</i>          |                                         |                                       |                    |                                       |
| CDK4                      | Cyclin-dependent kinase 4               | 40                                    |                    |                                       |
| NRAS                      | GTPase NRas                             |                                       | p.Gln61Lys         | Missense variant                      |
| MET                       | Tyrosine-protein kinase Met             |                                       | p.Met362Thr        | Missense variant                      |
| ERBB3                     | Receptor tyrosine-protein kinase erbB-3 |                                       | p.Glu173Gln        | Missense variant                      |
| MDM2                      | E3 ubiquitin-protein ligase Mdm 2       | 66.5                                  | p.Glu333Asp        | Missense variant                      |
| RHOA                      | Ras homolog family member A             |                                       | p.Val43Ala         | Missense variant                      |
| GLI1                      | Glioma-associated oncogene homolog 1    | 40                                    |                    |                                       |
| <i>Tumour suppressors</i> |                                         |                                       |                    |                                       |
| KOS-1                     | TSC2                                    | Tuberous sclerosis-2                  | p.Met286Val        | Missense variant                      |
|                           | NF1                                     | Neurofibromatosis type 1              | p.Met645Val        | Missense variant                      |
|                           | NF2                                     | Neurofibromatosis type 2              | p.Thr480Met        | Missense variant                      |
|                           | CREBBP                                  | CREB-binding protein                  | p.Leu551Ile        | Missense variant                      |
| <i>Tumour suppressors</i> |                                         |                                       |                    |                                       |
| KOS-2                     | ASXL2                                   | Additional sex combs-like protein 2   | p.Gly1134Ser       | Missense variant                      |
| <i>Tumour suppressors</i> |                                         |                                       |                    |                                       |
| KOS-3                     | KMT2D                                   | Histone-lysine N-methyltransferase 2D | p.Met3349Val       | Missense variant                      |
|                           | CIC                                     | Capicua transcriptional repressor     | c.7187-8A>G        | Splice region variant, Intron variant |
| <i>Tumour suppressors</i> |                                         |                                       |                    |                                       |
| KOS-6                     | TSC1                                    | Tuberous sclerosis-1                  | p.Pro613Ser        | Missense variant                      |
|                           | CEBPA                                   | CCAAT/enhancer binding protein alpha  | p.His195_Pro196dup | Inframe insertion                     |
|                           | ARID1B                                  | AT-rich interaction domain 1B         | p.Pro605Ser        | Missense variant                      |
| <i>Tumour suppressors</i> |                                         |                                       |                    |                                       |

|       |                 |                                                                   |      |             |                  |
|-------|-----------------|-------------------------------------------------------------------|------|-------------|------------------|
| KOS-7 | TSC1            | Tuberous sclerosis-1                                              |      | p.Pro613Ser | Missense variant |
|       | ATRX            | Alpha thalassemia/mental retardation syndrome<br>X-linked protein |      | p.Asp412Gly | Missense variant |
|       | PDGFR           | Platelet derived growth factor receptor alpha                     | 9    |             |                  |
|       | <i>Oncogene</i> |                                                                   |      |             |                  |
|       | MYC             | Myelocytomatosis                                                  | 11.5 |             |                  |

**\*CNVs (Copy Number Variants): > 10 gene copies identified.**

**Supplementary Table S2 – Antibodies Used**

| <b>Primary Antibodies</b>   |                  |                                        |                         |
|-----------------------------|------------------|----------------------------------------|-------------------------|
| <b>Human Target Protein</b> | <b>Raised in</b> | <b>Company</b>                         | <b>Catalogue number</b> |
| p53                         | Mouse            | Santa Cruz, Dallas, TX                 | SC-126                  |
| RB1                         | Rabbit           | Santa Cruz, Dallas, TX                 | SC-50                   |
| c-Myc                       | Mouse            | Calbiochem, San Diego, CA              | OP10L                   |
| MDM2                        |                  |                                        |                         |
| β-actin                     | Rabbit           | Cell Signaling Technology, Danvers, MA | 4970S                   |
| <b>Secondary Antibodies</b> |                  |                                        |                         |
| <b>Target Protein</b>       | <b>Raised in</b> | <b>Company</b>                         | <b>Catalogue number</b> |
| Rabbit IgG (HRP conjugated) | Goat             | Bio-Rad, Hercules, CA                  | 1706515                 |
| Mouse IgG (HRP conjugated)  | Goat             | Bio-Rad, Hercules, CA                  | 1706516                 |

**Supplementary Table S3 – qPCR Settings Used**

|                        | <b>Time and Temperature setting</b>                                                                                                                                                             |
|------------------------|-------------------------------------------------------------------------------------------------------------------------------------------------------------------------------------------------|
| <b>DNase treatment</b> | 37° C for 15 min -> 70° C for 15 min -> 4° C                                                                                                                                                    |
| <b>cDNA synthesis</b>  | 20° C for 5 min -> 37° C for 5 min -> 42° C for 75 min -> 70° C for 15 min -> 4° C -> Store at -20° C                                                                                           |
| <b>RT-PCR</b>          | Holding stage: 95° C for 20 sec<br>Cycling Stage (40 cycles): 95° C for 3 sec -> 60° C for 30 sec<br>Melt curve stage (Melt curve 0.7): 95° C for 15 sec -> 60° C for 1 min -> 95° C for 15 sec |

**Supplementary Table S4 – qPCR Primer Sequences**

| <b>Name of primer</b> | <b>Sequence</b>               |
|-----------------------|-------------------------------|
| ETS-2 forward         | 5'-GGCGGTTTGAGTGAGACGAGA-3'   |
| ETS-2 reverse         | 5'-ACGTGCGCTCACCGAGAGCAG-3'   |
| β2M forward           | 5'-CCGTGGVTTAGCTGTGCTCGC-3'   |
| β2M reverse           | 5'-CCCACTTA ACTATCTTGGGCTG-3' |
